# Supplementary material
Source: publisher figshare collection journal article supplement (https://karger.figshare.com/ndownloader/files/27359663)
Supplement: Supplementary file 1 [file 27359663]

**Supplemental Table 4** Proportion of Visual Changes and Persistent Macular Thickening for the Entire Population through Study Period Compared to Baseline (Last Observation Carried Forward)

| **Characteristics** | **Month 12**  **% (95% CI)** | **Month 24**  **% (95% CI)** | **Month 36**  **% (95% CI)** |
| --- | --- | --- | --- |
| Proportion of eyes gaining ≥10 letters | 41.4  (37.2 to 45.5) | 40.7  (36.2 to 45.2) | 38.1  (33.1 to 43.1) |
| Proportion of eyes gaining ≥15 letters | 31.5  (28.1 to 35.0) | 29.7  (26.0 to 33.4) | 28.3  (24.0 to 32.5) |
| Proportion of eyes losing ≥10 letters | 13.5  (10.6 to 16.5) | 17.2  (13.7 to 20.7) | 17.4  (13.4 to 21.3) |
| Proportion of eyes losing ≥15 letters | 7.0  (4.7 to 9.4) | 14.2  (10.6 to 17.7) | 14.2  (10.2 to 18.3) |
| Proportion of eyes with CSFT ≥ gender specific criteria (female ≥ 305, male ≥ 320 µm) | 64.8  (60.4 to 69.3) | 57.6  (52.6 to 62.5) | 51.5  (44.9 to 57.0) |
| *CSFT = central subfield thickness, CI = confidence interval* | | | |
